# Supplementary material
Source: MDPI journal article supplement (https://www.mdpi.com/2673-7086/2/1/10)
Supplement: s1 [file s1]

Archive with 1 entries (1 files):
- geographies-1637838-supplementary.pdf
